# Supplementary material
Source: publisher figshare collection journal article supplement (https://tandf.figshare.com/articles/dataset/_/16611338)

Supplementary Figure 1

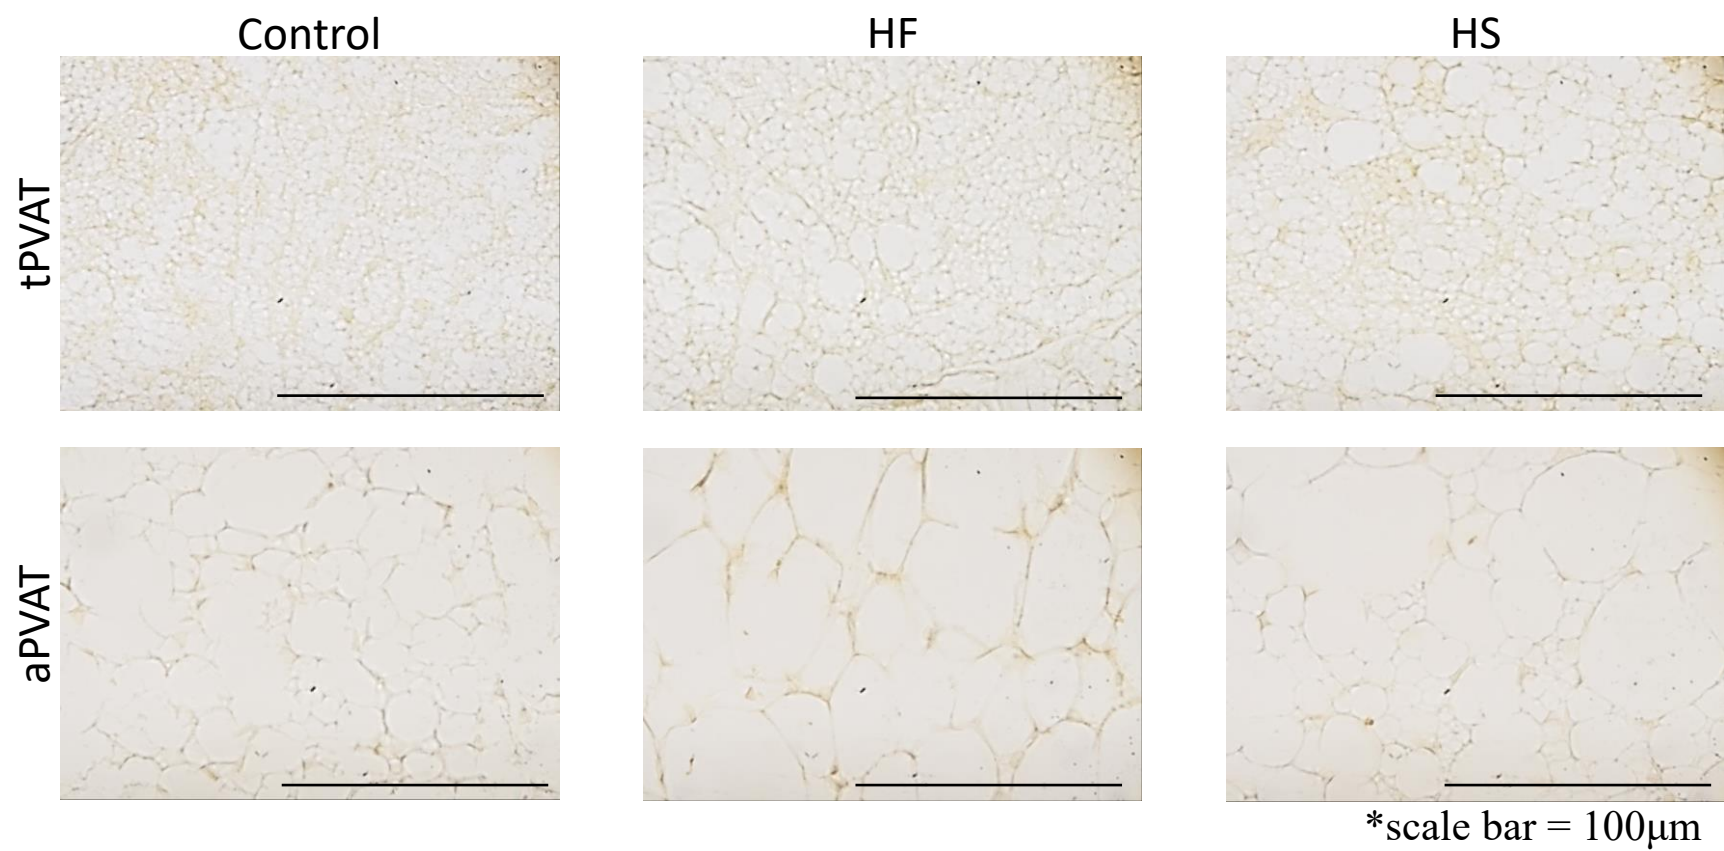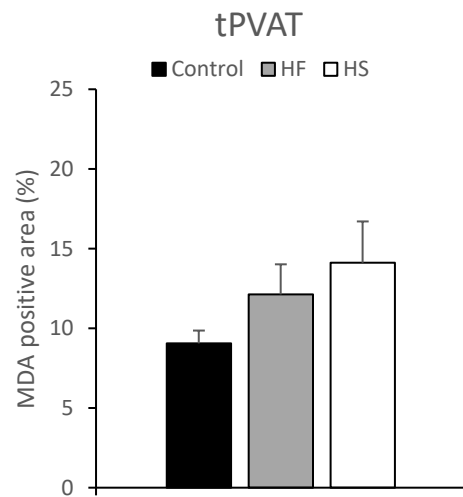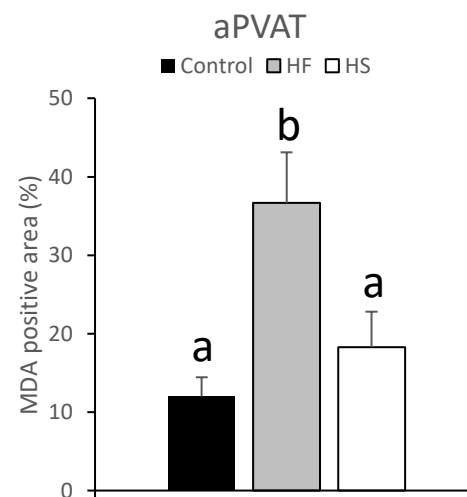

Supplement: Supplementary file 1 [file 2]

Supplementary Figure 2

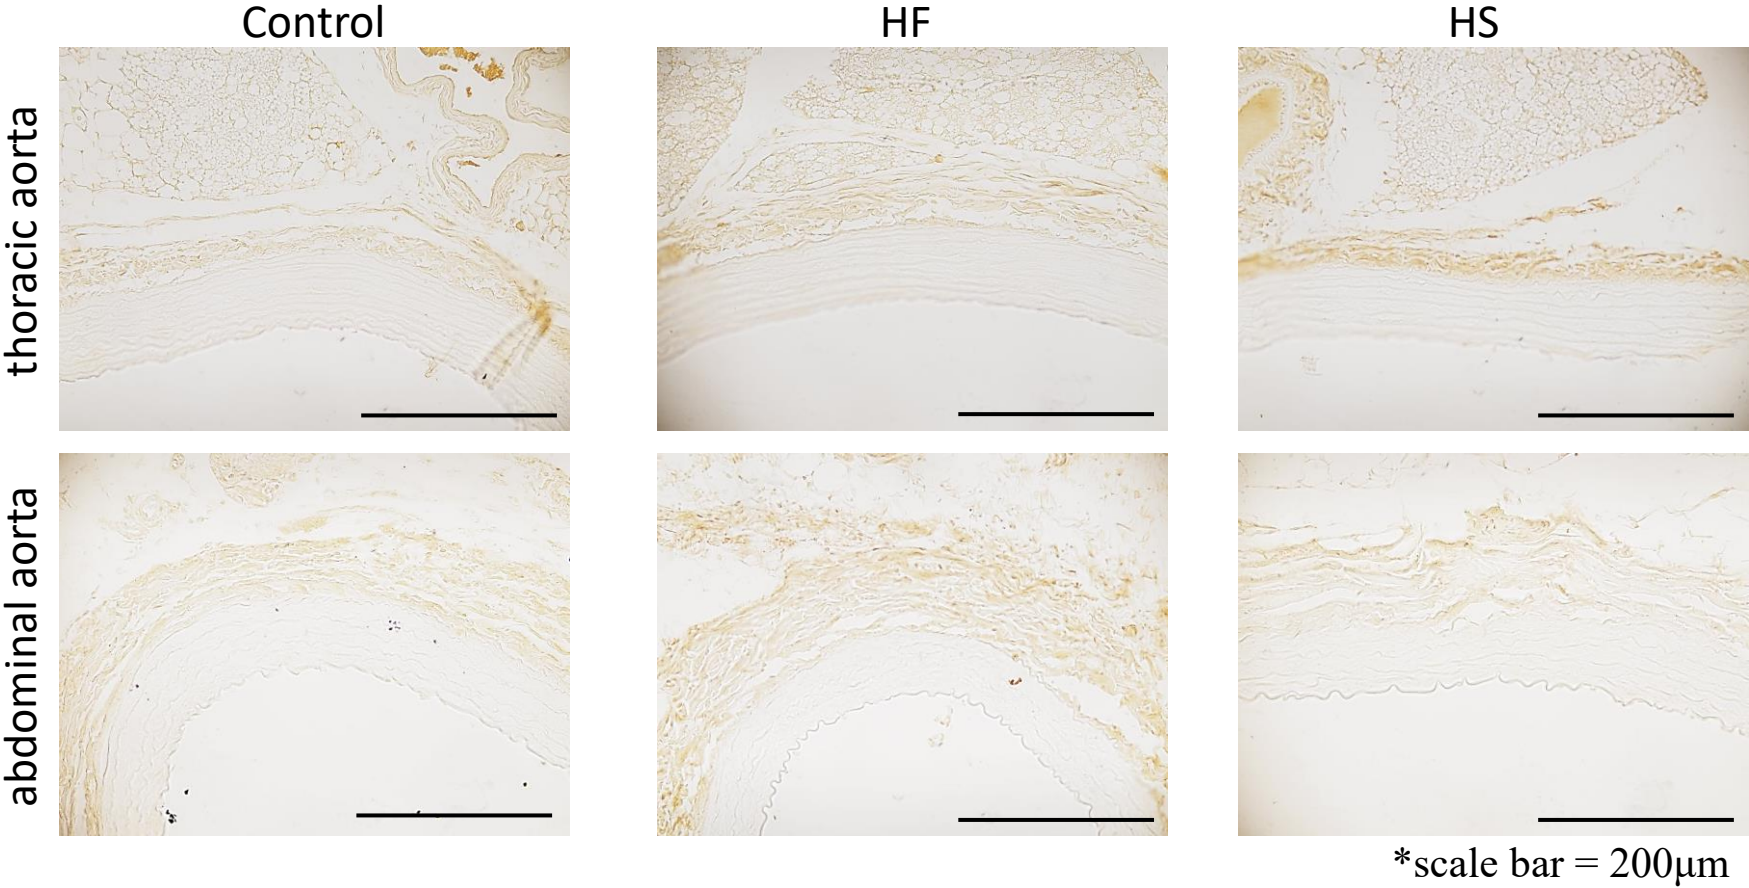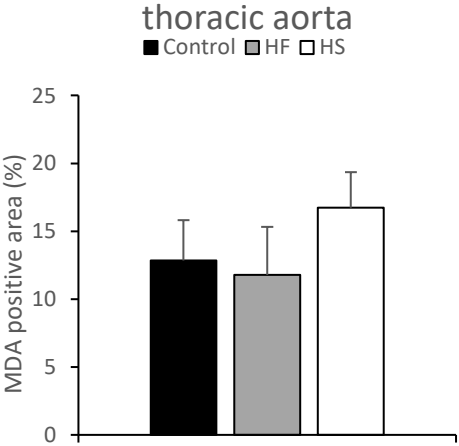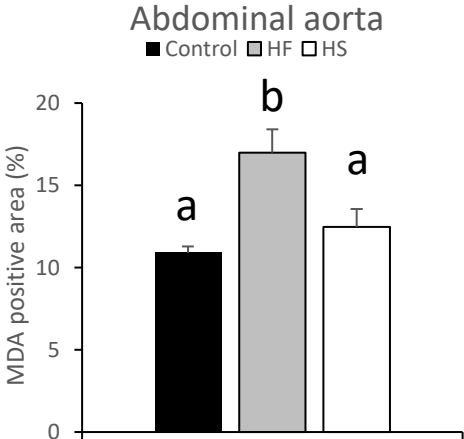

Supplement: Supplementary file 2 [file 2]
